# Supplementary material for: Insulin Signals Through the Dorsal Vagal Complex to Regulate Energy Balance
Source: Oxford University Press journal article supplement (doi:10.2337/db13-1044), 2013-11-23

SUPPLEMENTARY DATA

**Supplementary Table 1.** Food intake and body weight at 14h, 24h and 48h post DVC injections.

|                                        | Food Intake (g) |              |              | Body Weight (% increase) |              |
|----------------------------------------|-----------------|--------------|--------------|--------------------------|--------------|
|                                        | 14 h            | 24h          | 48h          | 14h                      | 24h          |
| DVC-saline (n=13)                      | 33.35 ± 0.96    | 35.79 ± 0.95 | 70.84 ± 1.8  | 3.92 ± 0.42              | 1.78 ± 0.66  |
| DVC-Insulin 2 mU/μl (n=11)             | 28.12 ± 1.24    | 33.3 ± 4.16  | 61.52 ± 6.91 | 2.91 ± 0.37              | 0.61 ± 0.57  |
| DVC-Insulin 200 μU/μl (n=5)            | 27.18 ± 3.40    | 29.44 ± 2.85 | 64.11 ± 4.82 | 1.91 ± 1.40              | -0.41 ± 1.07 |
| DVC-Insulin 20 μU/μl (n=5)             | 31.34 ± 3.18    | 32.7 ± 2.89  | 68.86 ± 4.23 | 2.64 ± 0.62              | 0.11 ± 0.35  |
| DVC-Insulin 2 μU/μl (n=5)              | 29.2 ± 1.76     | 31.03 ± 2.1  | 65.78 ± 4.36 | 2.73 ± 0.66              | 0.73 ± 0.71  |
| DVC-PD9809+Saline (n=6)                | 29.13 ± 2.57    | 31.2 ± 1.95  | 63.59 ± 3.47 | 2.09 ± 0.51              | -0.23 ± 0.64 |
| DVC-PD9809+insulin 400 μU/site (n=6)   | 31.41 ± 1.21    | 32.11 ± 1.20 | 65.07 ± 2.78 | 3.28 ± 0.78              | -0.23 ± 0.82 |
| DVC-LY294002+Saline (n=7)              | 28.65 ± 2.21    | 30.6 ± 2.74  | 59.25 ± 6.49 | 2.44 ± 0.96              | -0.51 ± 0.92 |
| DVC-LY294002+insulin 400 μU/site (n=7) | 24.741 ± 1.86   | 26.62 ± 2.31 | 56.28 ± 6.26 | 2.45 ± 0.46              | -0.21 ± 0.74 |

The food intake of the indicated groups of rats was measured 14, 24 and 48 h after the DVC injection. The body weight is expressed as % increase over the body weight recorded at time 0 (i.e., before DVC injection).

SUPPLEMENTARY DATA

**Supplementary Figure 1.** Localization of GFP adenovirus. Rats implanted with a bilateral DVC catheter were infected with the adenovirus expressing the GFP the day of the surgery. Rats were then subjected to cardiac perfusion with 4% paraformaldehyde. Paraformaldehyde-fixed DVC tissues were frozen in liquid nitrogen and stored at  $-80^{\circ}\text{C}$  until sectioning using a cryostat (Leica CM1950, Leica Microsystems, Nussloch, Germany) at  $-20^{\circ}\text{C}$ . Coronal sections of  $10\ \mu\text{m}$  were taken from the frozen tissues. For immunohistochemical staining, slides were washed in Tris-buffered saline (TBS) plus 0.025% Triton X-100 with gentle agitation. The cover slip was then mounted using ProLong Gold Antifade reagent with DAPI. Immunostaining was detected with a fluorescence microscope (QImaging, Olympus IX71). In the figure the GFP, Dapi and merge of the two staining are shown. The upper panels (A, B, C) show a snapshot of the squared red area in the scheme (G). The lower panels (D, E F) show a snapshot of the blue squared area in the scheme (G)

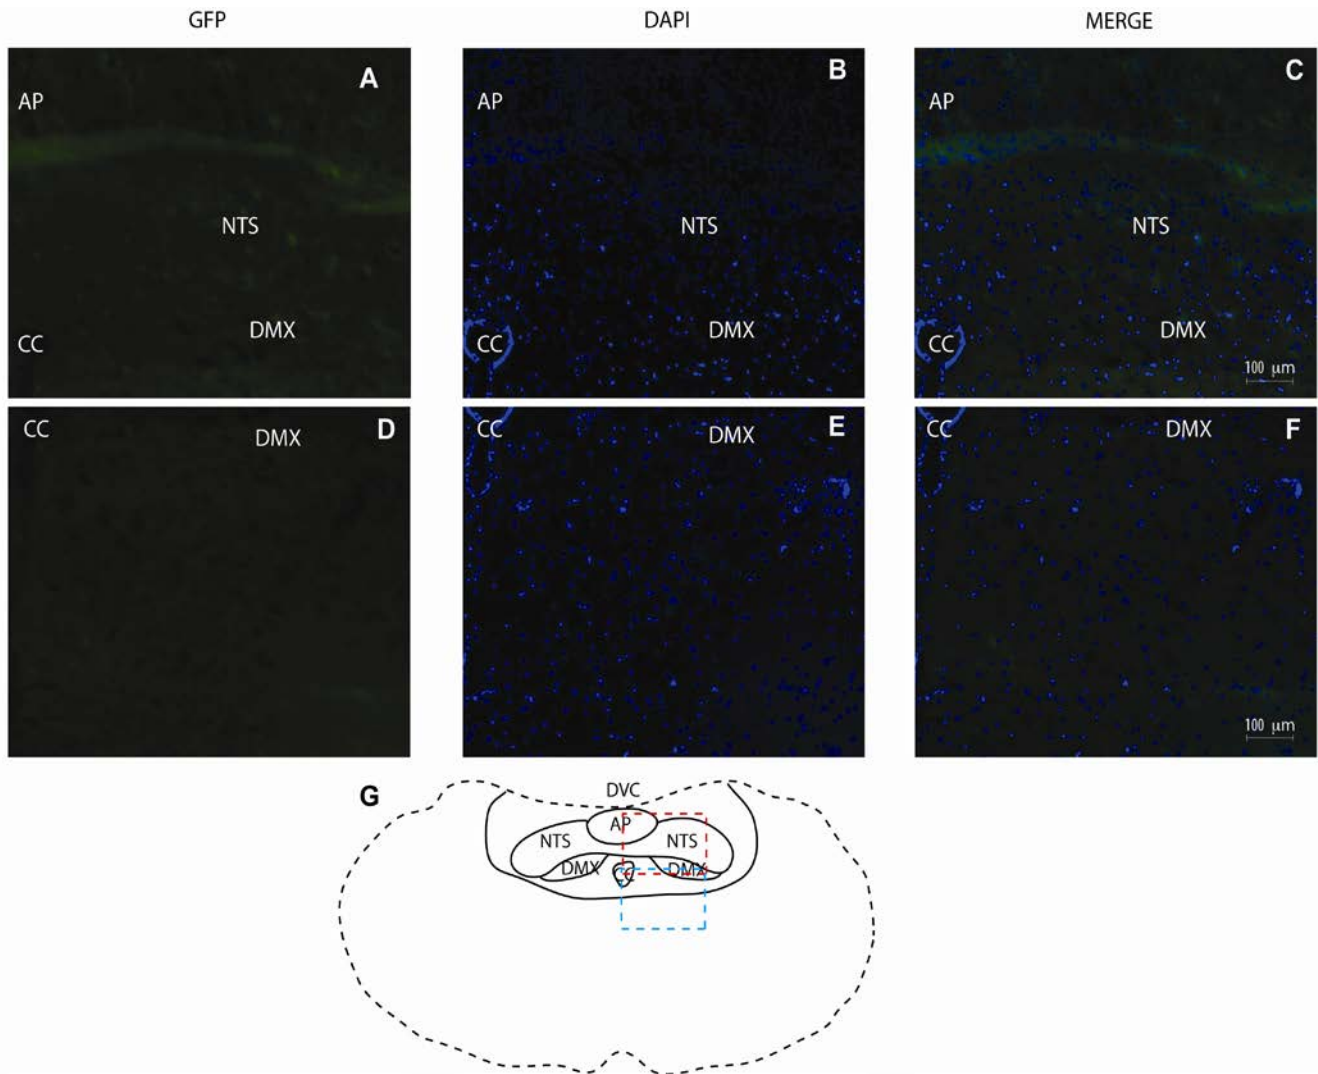

Supplement: db131044supplementarydata.pdf [file db131044supplementarydata.pdf]
